# Supplementary material for: Into the Dark Serum Proteome: Personalized Features of IgG1 and IgA1 Repertoires in Severe COVID-19 Patients
Source: PubMed Central journal article supplement — Mol Cell Proteomics. 2023 Dec 6;23(1):100690. doi: 10.1016/j.mcpro.2023.100690 (PMC10784693; doi:10.1016/j.mcpro.2023.100690), 2023-12-06
Supplement: mmc1.pdf [file mmc1.pdf]

# Supplementary figures to

## Into the dark serum proteome: personalized features of IgG1 and IgA1 repertoires in severe COVID-19 patients

Albert Bondt<sup>1,2,†</sup>, Max Hoek<sup>1,2,†</sup>, Kelly Dingess<sup>1,2</sup>, Sem Tamara<sup>1,2</sup>, Bastiaan de Graaf<sup>1,2</sup>, Weiwei Peng<sup>1,2</sup>, Maurits A. den Boer<sup>1,2</sup>, Mirjam Damen<sup>1,2</sup>, Ceri Zwart<sup>1,2</sup>, Arjan Barendregt<sup>1,2</sup>, Danique M.H. van Rijswijck<sup>1,2</sup>, Douwe Schulte<sup>1,2</sup>, Marloes Grobben<sup>3</sup>, Khadija Tejjani<sup>3</sup>, Jacqueline van Rijswijk<sup>3</sup>, Franziska Völlmy<sup>1,2</sup>, Joost Snijder<sup>1,2</sup>, Francesca Fortini<sup>4</sup>, Alberto Papi<sup>5</sup>, Carlo Alberto Volta<sup>6</sup>, Gianluca Campo<sup>7</sup>, Marco Contoli<sup>5</sup>, Marit J. van Gils<sup>3</sup>, Savino Spadaro<sup>6</sup>, Paola Rizzo<sup>4,8</sup>  
and Albert J.R. Heck<sup>1,2,\*</sup>

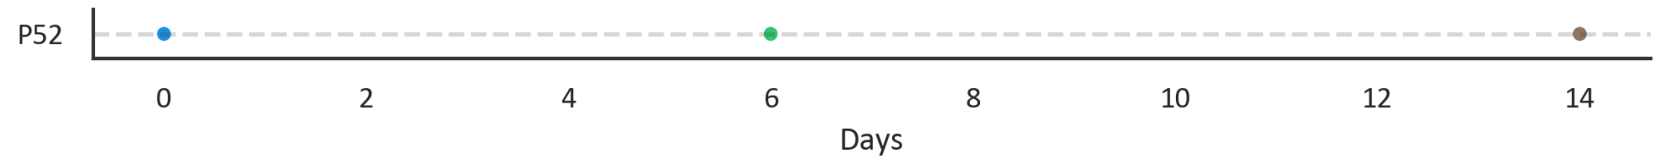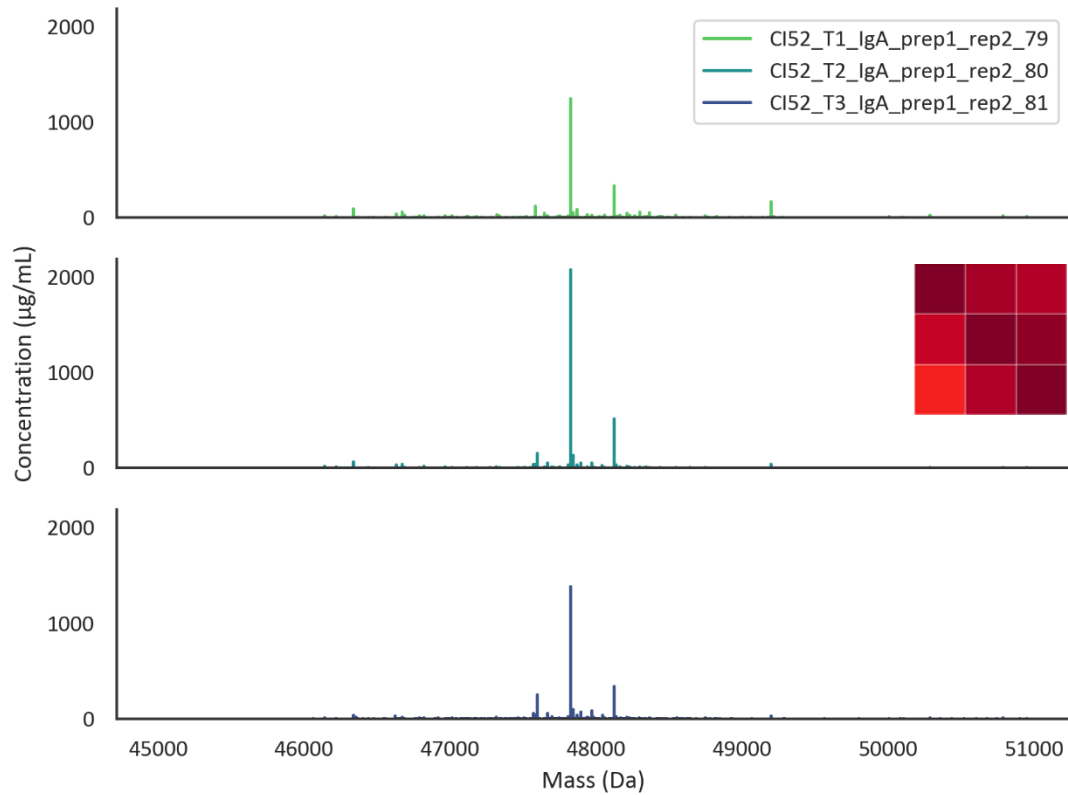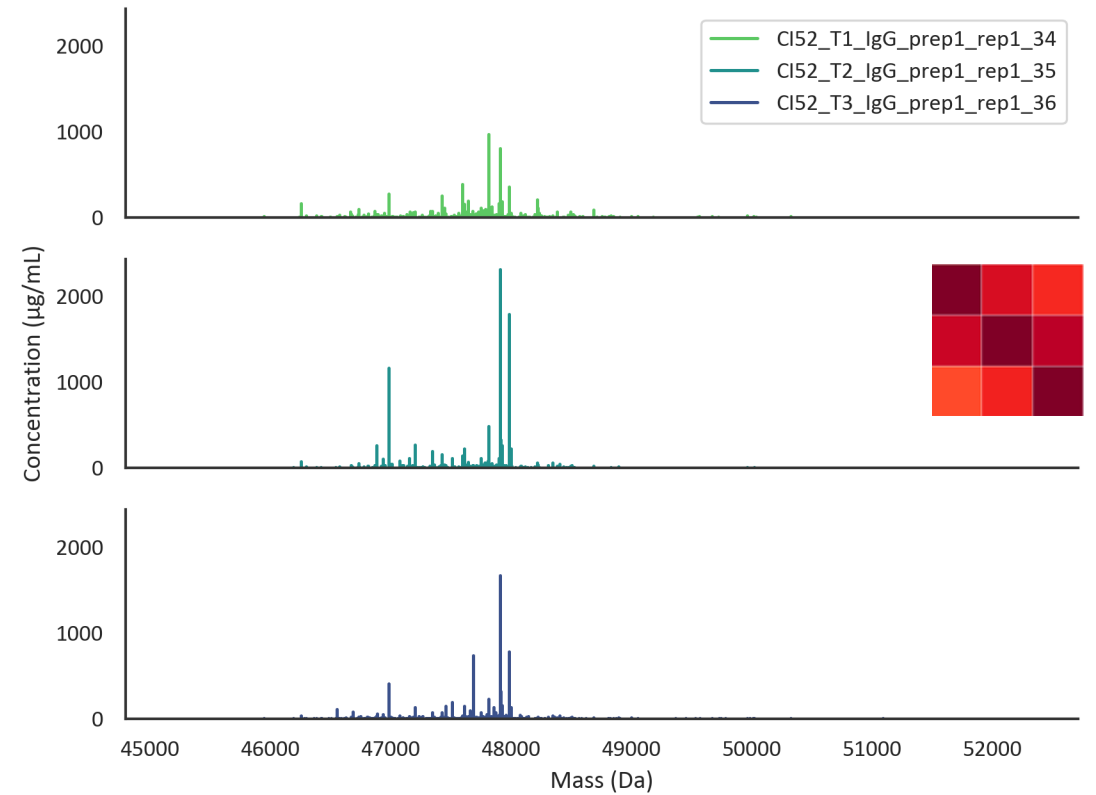

**Supplementary Figure S1** | Fab mass profiles of P52 showing a limited number of dominant clones, reaching more than 1 mg/mL per individual clone.



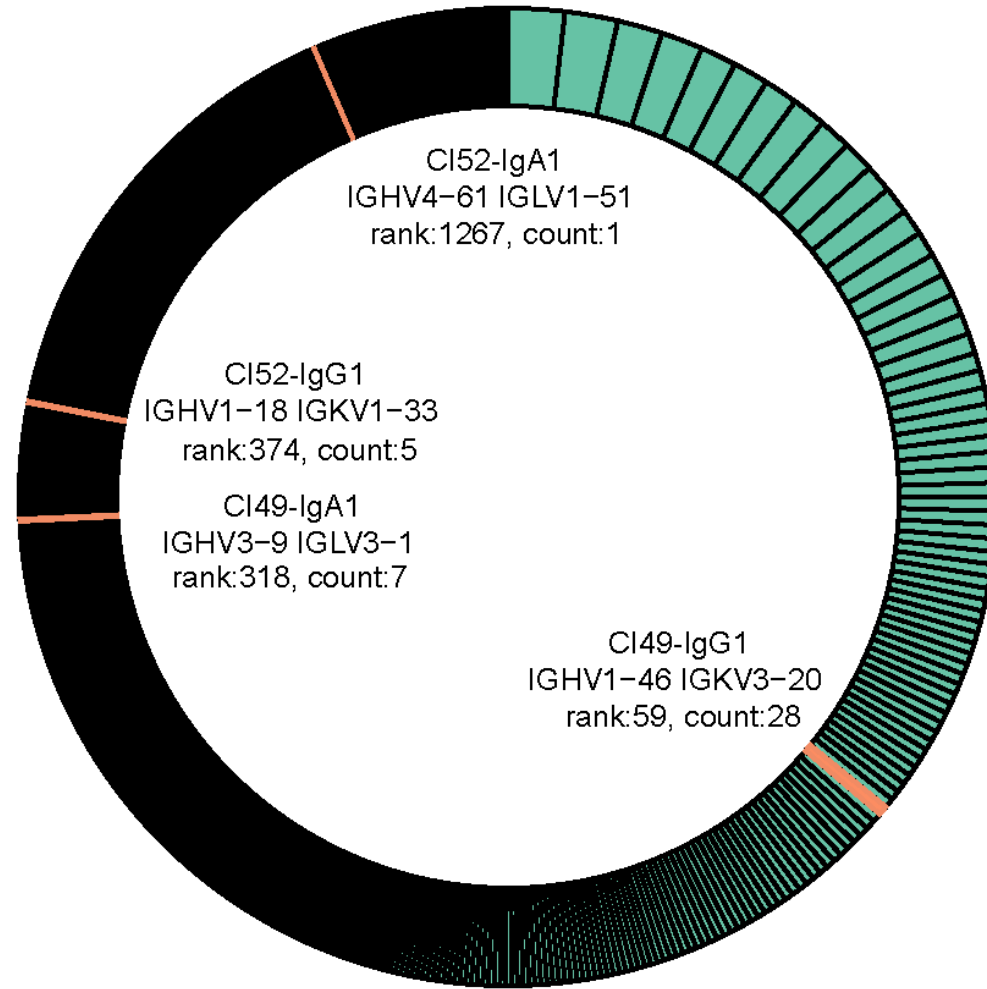

**Supplementary Figure S3 | Matching of HV-LV combinations to the Cov-AbDab.**

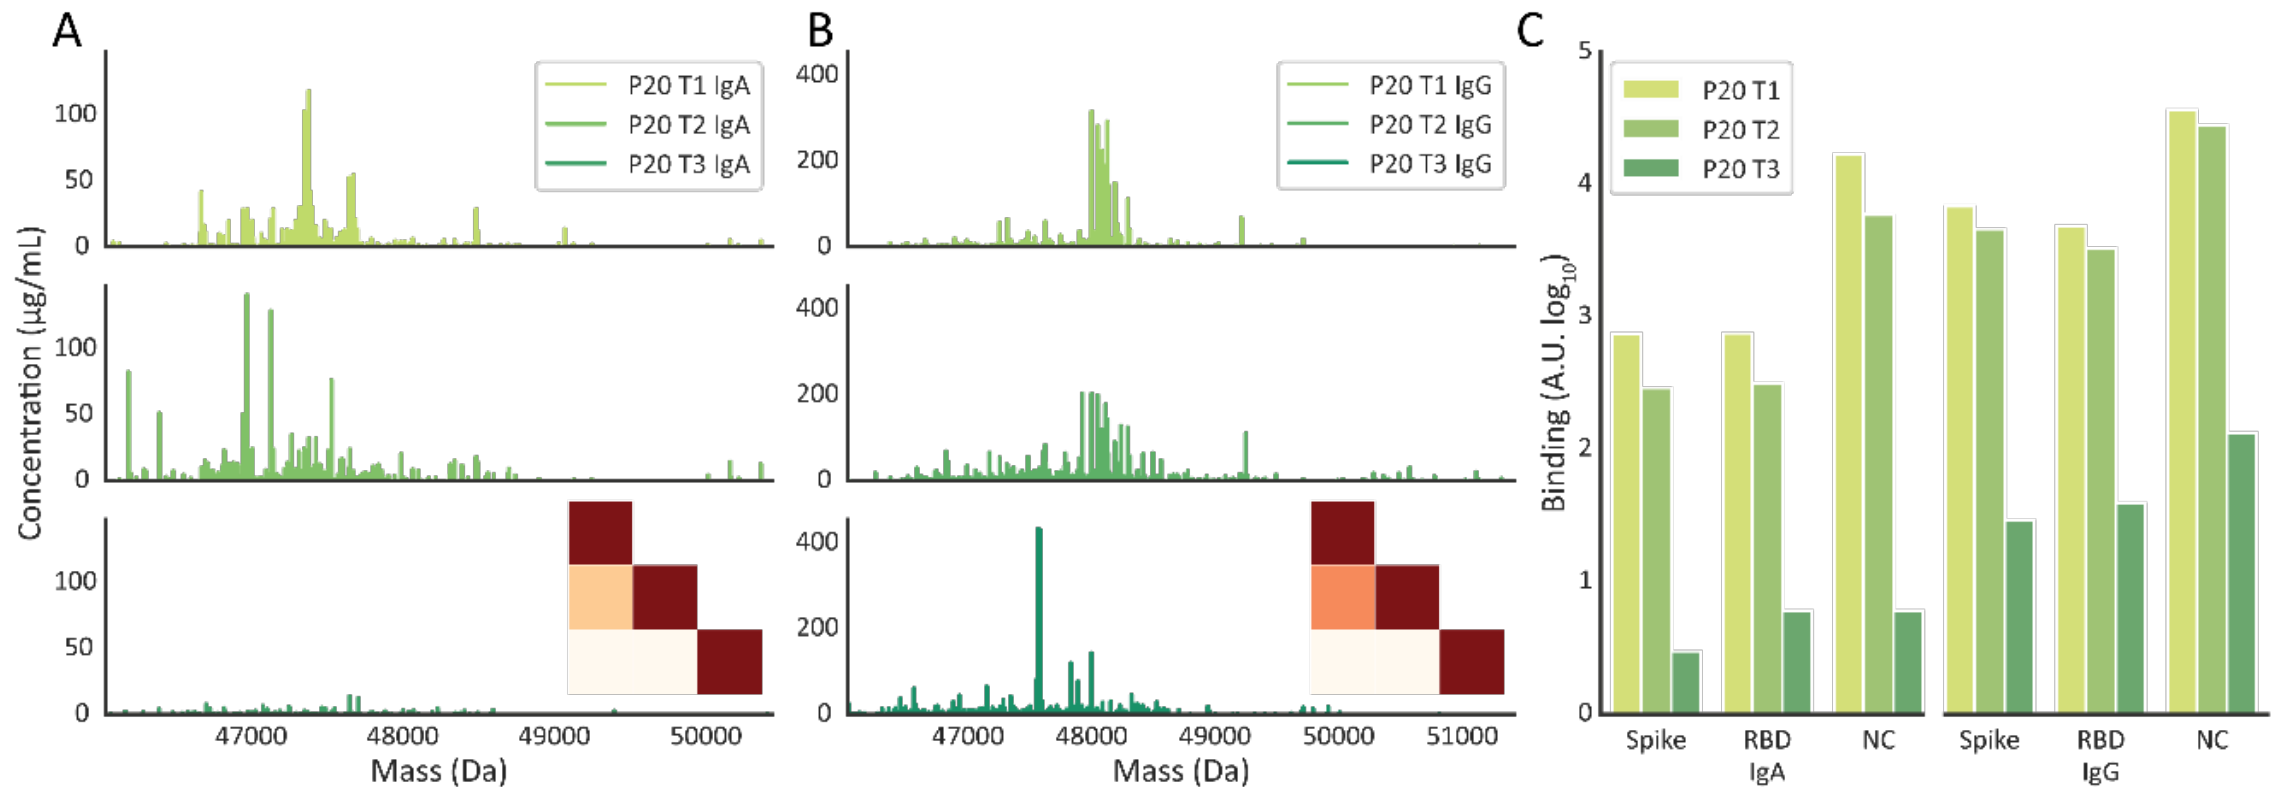

**Supplementary Figure S4 | Defining an outlier serum sample by IgG1 and IgA1 repertoire profiling** **A)** IgG1 and IgA1 Fab mass profiles of patient P20. Particularly between T2 and T3 the Fab mass profiles of both IgA1 and IgG1 change dramatically, with no clonal overlap at all, resulting in an extremely low correlation. **B)** SARS-CoV-2 antigen binding monitored by a Luminex assays probing the binding of total IgG or IgA to the antigens; spike-trimer, receptor-binding domain and nucleocapsid protein for P20.
